# Supplementary material
Source: PubMed Central journal article supplement (PMC10843634)

## SUPPLEMENTAL MATERIAL

### Supplemental Methods

#### Study participants

This study was based on a nested case-control study of CHD within the SCCS<sup>49</sup>. Briefly, the SCCS enrolled 84,735 primarily low-income, uninsured/underinsured Black and White Americans aged 40-79 years from 12 southeastern US states between 2002-2009, with >50% having household income <\$15,000/y and ~86% were uninsured or underinsured<sup>49</sup>.

Participants were surveyed for a wide range of information at baseline and followed up regularly for morbidity and mortality outcomes. Venous blood samples were collected at the same time as the baseline survey, and plasma samples were aliquoted and stored at -80°C for long-term use. A nested case-control study of CHD within SWMHS was used as the validation cohort. The SWMHS enrolled 74,940 women aged 40-70 years and 61,480 men aged 40-74 years from Shanghai, China, between 1996-2000 and 2002-2006<sup>50,51</sup>. These cohort studies were approved by the Institutional Review Boards of the Vanderbilt University Medical Center, Meharry Medical College, and/or Shanghai Cancer Institute. Informed consent was obtained from all enrolled participants.

For the nested case-control studies, participant inclusion criteria were 1) no history of CHD, stroke, heart failure, cancer, or end-stage renal disease at baseline; 2) available baseline plasma samples and data on fasting time and in SCCS, the time between sample collection and lab processing; 3) no use of antibiotics nor cold/flu in last 7 days before blood collection to minimize the potential influence of acute disease and medications on gut microbiota-

related metabolites; 4) in SCCS, participants were eligible for Centers for Medicare & Medicaid Services (CMS) and had  $\geq 2$  claims after cohort enrollment; in SWMHS, participants' medical records were accessible for our study. In SCCS, nonfatal CHD cases were identified through CMS data, including acute myocardial infarction, coronary revascularization, and other CHD, and CHD deaths were identified through the National Death Index. In SWMHS, CHD cases were first identified by self-reported diagnoses during follow-up visits and then confirmed by medical records. After applying inclusion criteria as of August 2020, there were 322 Black women, 365 Black men, 304 White women, 266 White men, 305 Chinese women, and 395 Chinese men identified as incident CHD cases in the SCCS and SWMHS. In each race (Black, White, or Chinese) and sex (male or female), 150 incident CHD cases were randomly selected and 1:1 matched to controls who had no CHD, heart failure, stroke, or cancer at the time of case diagnosis, by enrollment age ( $\pm 2$  years), fasting time ( $\pm 2$  hours), and time between sample collection and lab processing ( $\pm 4$  hours, for SCCS samples; all SWMHS samples were processed within 6 hours after collection). After excluding eight plasma samples that failed the metabolomics quality control, a total of 1792 participants, including 597 CHD case-control pairs in SCCS (299 pairs of Black Americans and 298 pairs of White Americans) and 299 pairs of Chinese adults in SWMHS were included in the present study (**Fig. I** in the Data Supplement).

### **Life's Essential 8**

We constructed each LE8 component metric and total LE8 score according to AHA guidelines<sup>3,52</sup>, with some modifications based on the characteristics of our data, as shown in

**Table I** in the Data Supplement. Specifically, dietary quality was assessed by the Dietary Approaches to Stop Hypertension (DASH) score<sup>53-55</sup>, which was calculated based on validated food frequency questionnaires (FFQ). The SCCS FFQ included 89 food/beverage items capturing the main sources of energy and nutrient intakes for adults living in the southeastern US<sup>56,57</sup>, which was validated through 24-hour dietary recalls and demonstrated a high level of agreement (kappa was 0.82 to 0.96 for macronutrients and 0.73 to 0.95 for micronutrients)<sup>56</sup>. The SWMHS FFQs included 77 to 81 food items commonly consumed in Shanghai, China, which were validated through 24-hour dietary recalls with correlation coefficients being 0.38 to 0.66 for macronutrients and 0.33 to 0.59 for micronutrients<sup>58,59</sup>. Physical activity component was assessed by total minutes of leisure-time moderate and vigorous physical activity per week, with each minute of vigorous physical activity counted as 2 minutes toward the total minutes. The reliability and validity of the physical activity questionnaires used in SCCS and SWMHS were evaluated against physical activity monitors or logs in random samples of cohort participants and published previously<sup>60-62</sup>. Nicotine exposure was assessed by active tobacco smoking and secondhand smoking exposure. Sleep health was measured by the weighted average of self-reported sleep hours per day during weekdays and weekends. BMI was calculated as weight (kg)/height (m)<sup>2</sup> using self-reported weight and height at the baseline survey. Blood lipids component was assessed by non-HDL cholesterol (mg/dL) (plasma total cholesterol minus HDL cholesterol), which were measured by nuclear magnetic resonance (NMR) using the Bruker In Vitro Diagnostic Research (IVDr) Platform at the Vanderbilt NMR Facility Core. Because concentrations of fasting glucose and HbA1c were not measured in our study, blood glucose component was scored based on

diabetes diagnosis, use of anti-diabetic medications, and relative level of plasma glucose measured simultaneously with other metabolites (see following “metabolite profiling”).

Blood pressure was unavailable in SCCS, thus blood pressure component was scored based on hypertension status and use of anti-hypertensive medications. Total LE8 score was obtained by calculating the arithmetic mean of 8 individual component scores, ranging from 0 to 100<sup>3</sup>. We also calculated scores reflecting alignment with health behaviors (ie, diet, physical activity, smoking, and sleep) and health factors (ie, BMI, lipids, glucose, and blood pressure), respectively based on their component scores.

### **Metabolite profiling**

Baseline plasma samples of selected CHD case-control pairs were retrieved and placed adjacently and randomly in the same assay batch. Laboratory persons were blinded to the case-control status of samples. Pooled plasma samples were inserted after every ~30 study samples as quality control (QC) samples in addition to metabolite profiling QC samples. Untargeted metabolite profiling was performed using ultra-high-performance liquid chromatography (UHPLC) coupled with tandem mass spectrometry (MS) by Metabolon Inc. (Morrisville, NC, USA) following a standard assay protocol<sup>63</sup>. Briefly, plasma samples were extracted with methanol and split into four aliquots for analysis by UHPLC-MS/MS in both positive and negative ion modes using a combination of reverse phase and HILIC chromatography methods. Metabolites were identified by automated comparison of mass spectra features to a reference library of >4,000 authenticated standard compounds followed by visual inspection for quality control. Peaks were quantified using area-under-the-curve. A

total of 1502 metabolites were detected in our samples. The majority of metabolites (>80%) were annotated based on internal standards. Metabolites that were annotated only by a match to a known MS spectrum or chemical formula were marked by ‘\*’ and ‘\*\*’, respectively. The median coefficient of variance for all metabolites among our QC samples was 10.3% (interquartile range: 5.4%-19.1%). We excluded metabolites detected in <10% of participants, resulting in 1322 metabolites. Metabolites with missing values were imputed by half of the minimal value in the non-missing samples. The values of all metabolites were log-transformed and standardized to mean 0 and unit variance.

### **Statistical analysis**

The characteristics of the study participants were presented as mean (standard deviation [SD]) for continuous variables and frequency (percentage) for categorical variables. *Spearman* correlations between LE8 score and individual component scores were assessed. Elastic net regression was used to identify metabolites associated with LE8<sup>12,14,64</sup>, with hyperparameters determined via a ten-repeated tenfold cross-validation framework, using R package *caret* (version: 6.0-88)<sup>65</sup> and *glmnet* (version: 4.1-3)<sup>64,66</sup>. The MetaSig was calculated through a leave-one-out cross-validation approach in the SCCS dataset without using CHD outcome information. In addition, we externally validated the identified signature in SWMHS using weights (ie, elastic net regression coefficients) of the selected metabolites obtained from SCCS. We calculated *Spearman* correlations between LE8 score and MetaSig among all participants and by race, sex, age ( $\geq 60$ y/ $< 60$ y), incident CHD status, diabetes status, hypertension status, dyslipidemia status, and fasting status.

We then examined the associations of LE8 and its MetaSig with risk of CHD using conditional logistic regression, adjusting for age, education, income, alcohol intake, and family history of CHD. We also included LE8 score and MetaSig in the same model to assess their independent associations with CHD and potential mediating effect of MetaSig on LE8-CHD association. The potential multicollinearity was assessed by variance inflation factor (VIF) using R package car (version: 3.1-0) with VIF >10 indicating multicollinearity among variables. The ranges of VIF for LE8 score and its MetaSig were 1.08-1.37, confirming no multicollinearity. The causal mediation analysis was performed using R package mediation (version: 4.5.0)<sup>67</sup>, with assumptions of a linear dependency among LE8 score→MetaSig→CHD and sequential ignorability<sup>68</sup>, adjusting for age, sex, race, education, income, alcohol intake, family history of CHD, and fasting status. Subgroup analyses to evaluate the associations of LE8 and MetaSig with incident CHD were performed by race, age group, sex, education, household income, diabetes status, hypertension status, and dyslipidemia status, with *P* value for interaction obtained from the corresponding interaction term in the model.

The same methods were used to identify MetaSigs for health behaviors and health factors included in LE8 and evaluate their associations with incident CHD, potential mediation effects, and their external validity. Mutual adjustments of health behaviors and health factors scores were performed in corresponding statistical models. All analyses were performed using R (version 4.1.1). Two-sided *P* < 0.05 was considered statistically significant. An overview of our study design is presented in **Fig. I** in the Data Supplement.

## Supplemental Tables

**Table I. Measurement of alignment with Life's Essential 8 components**

| LE8 components          | Measurement   | Scoring |                           |        |                           |
|-------------------------|---------------|---------|---------------------------|--------|---------------------------|
|                         |               | SCCS    |                           | SWMHS  |                           |
| Diet score              | DASH score    | Points  | Quantile                  | Points | Quantile                  |
|                         |               | 100     | ≥95th percentile          | 100    | ≥95th percentile          |
|                         |               | 80      | 75th-94th percentile      | 80     | 75th-94th percentile      |
|                         |               | 50      | 50th-74th percentile      | 50     | 50th-74th percentile      |
|                         |               | 25      | 25th-49th percentile      | 25     | 25th-49th percentile      |
|                         |               | 0       | ≤24th percentile          | 0      | ≤24th percentile          |
| Physical activity score | Self-reported | Points  | Minutes                   | Points | Minutes                   |
|                         | total minutes | 100     | ≥150                      | 100    | ≥150                      |
|                         | of leisure-   | 90      | 120-149                   | 90     | 120-149                   |
|                         | time moderate | 80      | 90-119                    | 80     | 90-119                    |
|                         | and vigorous  | 60      | 60-89                     | 60     | 60-89                     |
|                         | physical      | 40      | 30-59                     | 40     | 30-59                     |
|                         | activity per  | 20      | 1-29                      | 20     | 1-29                      |
| week                    | 0             | 0       | 0                         | 0      |                           |
| Smoking score           | Tobacco       | Points  | Status                    | Points | Status                    |
|                         | smoking and   | 100     | Never smoker              | 100    | Never smoker              |
|                         | secondhand    | 75      | Former smoker, quit ≥5y   | 75     | Former smoker, quit ≥5y   |
|                         | smoke         | 50      | Former smoker, quit 1-<5y | 50     | Former smoker, quit 1-<5y |

|              |                                           |                                                                                         |                                                              |                                                                                         |                                                              |
|--------------|-------------------------------------------|-----------------------------------------------------------------------------------------|--------------------------------------------------------------|-----------------------------------------------------------------------------------------|--------------------------------------------------------------|
|              | exposure                                  | 25<br>0<br>Subtract 20 points (unless score is 0)<br>for exposing to secondhand smoking | Former smoker, quit <1y<br>Current smoker                    | 25<br>0<br>Subtract 20 points (unless score is 0)<br>for exposing to secondhand smoking | Former smoker, quit <1y<br>Current smoker                    |
| Sleep score  | Average self-reported sleep hours per day | Points<br>100<br>90<br>70<br>40<br>20<br>0                                              | Level<br>7-<9<br>9-<10<br>6-<7<br>5-<6 or ≥10<br>4-<5<br><4  | Points<br>100<br>90<br>70<br>40<br>20<br>0                                              | Levels<br>7-<9<br>9-<10<br>6-<7<br>5-<6 or ≥10<br>4-<5<br><4 |
| BMI score    | Weight (kg)/height (m) <sup>2</sup>       | Points<br>100<br>70<br>30<br>15<br>0                                                    | Level<br><25<br>25.0-29.9<br>30.0-34.9<br>35.0-39.9<br>≥40.0 | Points<br>100<br>75<br>50<br>25<br>0                                                    | Level<br><23<br>23.0-24.9<br>25.0-29.9<br>30.0-34.9<br>≥35.0 |
| Lipids score | Non-HDL cholesterol (mg/dL)               | Points<br>100<br>60<br>40<br>20                                                         | Level<br><130<br>130-159<br>160-189<br>190-219               | Points<br>100<br>60<br>40<br>20                                                         | Level<br><130<br>130-159<br>160-189<br>190-219               |



|                      |                                                                               |                                                                                                                                                                                                                                                                                                                                                                            |                                                                                                                                                                                                                                                                                                                                                                            |
|----------------------|-------------------------------------------------------------------------------|----------------------------------------------------------------------------------------------------------------------------------------------------------------------------------------------------------------------------------------------------------------------------------------------------------------------------------------------------------------------------|----------------------------------------------------------------------------------------------------------------------------------------------------------------------------------------------------------------------------------------------------------------------------------------------------------------------------------------------------------------------------|
|                      |                                                                               | 0 $\geq 220$<br><br>If drug-treated level, subtract 20<br><br>points (unless score is 0)                                                                                                                                                                                                                                                                                   | 0 $\geq 220$<br><br>If drug-treated level, subtract 20<br><br>points (unless score is 0)                                                                                                                                                                                                                                                                                   |
| Glucose score        | T2D status and glucose abundance measured by untargeted metabolomic profiling | Points    Level<br><br>Without diabetes<br><br>100    Glucose <50th percentile<br><br>60    Glucose $\geq$ 50th percentile<br><br>With diabetes<br><br>40    Glucose <20th percentile<br><br>Glucose 20th-<40th<br>30    percentile<br><br>Glucose 40th-<60th<br>20    percentile<br><br>Glucose 60th-<80th<br>10    percentile<br><br>0    Glucose $\geq$ 80th percentile | Points    Level<br><br>Without diabetes<br><br>100    Glucose <50th percentile<br><br>60    Glucose $\geq$ 50th percentile<br><br>With diabetes<br><br>40    Glucose <20th percentile<br><br>Glucose 20th-<40th<br>30    percentile<br><br>Glucose 40th-<60th<br>20    percentile<br><br>Glucose 60th-<80th<br>10    percentile<br><br>0    Glucose $\geq$ 80th percentile |
| Blood pressure score | SCCS:<br>hypertension status and number of medications;<br>SWMHS:             | Points    Level<br><br>100    Without hypertension<br><br>With hypertension<br><br>50    Without taking medications                                                                                                                                                                                                                                                        | Points    Level<br><br>100    SBP<120 and DBP<80<br><br>SBP 120-<130 and<br>75    DBP<80<br><br>SBP 130-<140 or DBP 80-<br>50    <90                                                                                                                                                                                                                                       |

|  |                   |    |                          |    |                                                                                            |
|--|-------------------|----|--------------------------|----|--------------------------------------------------------------------------------------------|
|  | SBP (mmHg)        | 25 | Taking only 1 medication | 25 | SBP 140-<160 or DBP 90-<100                                                                |
|  | and DBP<br>(mmHg) | 0  | Taking >1 medication     | 0  | SBP $\geq$ 160 or DBP $\geq$ 100                                                           |
|  |                   |    |                          |    | Subtract 20 points if participant receive anti-hypertension treatment (minimal score is 0) |

**Table II. Life's Essential 8 scores between incident CHD and control groups among male and female participants in the Southern Community Cohort Study**

|                                                 | Male participants |                 | Female participants |                 |
|-------------------------------------------------|-------------------|-----------------|---------------------|-----------------|
|                                                 | CHD (N=297)       | Control (N=297) | CHD (N=300)         | Control (N=300) |
| Life's Essential 8 score                        | 46.6 (13.5)       | 51.9 (14.0)     | 44.3 (11.9)         | 51.9 (12.7)     |
| Life's Essential 8 score category, <i>n</i> (%) |                   |                 |                     |                 |
| High (80-100)                                   | 3 (1.0)           | 10 (3.4)        | 0 (0.0)             | 7 (2.3)         |
| Moderate (50-79)                                | 119 (40.1)        | 160 (53.9)      | 95 (31.7)           | 162 (54.0)      |
| Low (0-49)                                      | 175 (58.9)        | 127 (42.8)      | 205 (68.3)          | 131 (43.7)      |
| Health behaviors score                          | 41.0 (19.2)       | 41.7 (21.2)     | 44.7 (18.3)         | 52.0 (19.0)     |
| Health factors score                            | 51.9 (21.5)       | 61.5 (20.4)     | 43.4 (18.5)         | 51.5 (19.7)     |
| Diet score                                      | 31.8 (28.5)       | 31.5 (27.6)     | 45.0 (32.6)         | 50.6 (32.1)     |
| Physical activity score                         | 29.3 (44.0)       | 26.7 (42.2)     | 13.5 (32.2)         | 18.8 (36.9)     |
| Smoking score                                   | 29.9 (37.1)       | 33.2 (40.3)     | 53.0 (41.9)         | 60.8 (39.5)     |
| Sleep score                                     | 73.6 (28.8)       | 76.1 (28.0)     | 69.9 (30.0)         | 79.1 (25.0)     |
| Body mass index score                           | 58.1 (35.2)       | 67.2 (32.0)     | 42.4 (31.5)         | 47.5 (34.7)     |
| Blood lipids score                              | 34.9 (33.5)       | 43.0 (31.9)     | 27.7 (28.6)         | 29.6 (28.4)     |
| Blood glucose score                             | 59.8 (33.6)       | 70.6 (27.3)     | 55.4 (34.8)         | 72.4 (29.5)     |
| Blood pressure score                            | 54.7 (36.8)       | 65.3 (37.8)     | 47.9 (36.7)         | 56.4 (38.7)     |

**Table III. Characteristics of study participants in the Shanghai Women's and Men's Health Studies**

|                                       | CHD cases ( <i>N</i> =299) | Controls ( <i>N</i> =299) |
|---------------------------------------|----------------------------|---------------------------|
| Age, years                            | 61.5 (8.3)                 | 61.4 (8.3)                |
| Male, <i>n</i> (%)                    | 149 (49.8)                 | 149 (49.8)                |
| Education, <i>n</i> (%)               |                            |                           |
| Less than high school                 | 181 (60.5)                 | 184 (61.5)                |
| Completed high school                 | 67 (22.4)                  | 61 (20.4)                 |
| Vocational school or some college     | 29 (9.7)                   | 22 (7.4)                  |
| College or graduate school            | 22 (7.4)                   | 32 (10.7)                 |
| Income, <i>n</i> (%)*                 |                            |                           |
| Low                                   | 59 (19.7)                  | 54 (18.1)                 |
| Middle                                | 224 (74.9)                 | 231 (77.3)                |
| High                                  | 16 (5.4)                   | 14 (4.7)                  |
| Alcohol intake, <i>n</i> (%)†         |                            |                           |
| None                                  | 258 (86.3)                 | 255 (85.3)                |
| Moderate                              | 22 (7.4)                   | 31 (10.4)                 |
| Heavy                                 | 19 (6.4)                   | 13 (4.3)                  |
| Family history of CHD, <i>n</i> (%)   | 43 (14.4)                  | 33 (11.0)                 |
| History of diabetes, <i>n</i> (%)     | 58 (19.4)                  | 25 (8.4)                  |
| History of dyslipidemia, <i>n</i> (%) | 34 (11.4)                  | 22 (7.4)                  |
| History of hypertension, <i>n</i> (%) | 151 (50.5)                 | 101 (33.8)                |

|                                                  |             |             |
|--------------------------------------------------|-------------|-------------|
| Life's Essential 8 score                         | 50.7 (12.0) | 57.2 (12.8) |
| Life's Essential 8 score category, <i>n</i> (%)‡ |             |             |
| High (80-100)                                    | 1 (0.3)     | 7 (2.3)     |
| Moderate (50-79)                                 | 160 (53.5)  | 207 (69.2)  |
| Low (0-49)                                       | 138 (46.2)  | 85 (28.4)   |
| Health behaviors score                           | 53.6 (21.8) | 58.0 (22.3) |
| Health factors score                             | 47.8 (15.6) | 56.2 (15.7) |
| Diet score                                       | 35.5 (30.4) | 44.0 (31.8) |
| Physical activity score                          | 44.6 (49.0) | 46.4 (48.9) |
| Smoking score                                    | 61.4 (40.4) | 67.7 (38.2) |
| Sleep score                                      | 79.9 (24.6) | 79.9 (25.0) |
| Body mass index score                            | 68.4 (25.8) | 73.2 (22.9) |
| Blood lipids score                               | 38.0 (31.9) | 48.3 (32.5) |
| Blood glucose score                              | 66.9 (30.2) | 76.4 (25.5) |
| Blood pressure score                             | 15.0 (27.2) | 25.6 (35.8) |

Data were mean (standard deviation) or *n* (%) as indicated.

\*Annual income per capita < ¥ 6,000, ¥ 6,000 to < ¥ 10,000, and ≥ ¥ 10,000 for low, middle, and high levels of income, respectively in Chinese men and < ¥ 4000, ¥ 4,000 to < ¥ 8,000, and ≥ ¥ 8,000 for low, middle, and high levels of income, respectively in Chinese women.

†Alcohol intake was grouped as none, moderate (>0 to ≤2 drinks per day in men or >0 to ≤1 drink per day in women; 1 drink = 14 g ethanol), and heavy drinking (>2 drinks per day in men or >1 drink per day in women).

‡The cutoffs were provided by the American Heart Association<sup>3</sup>.

**Table IV. Full list of metabolites related to LE8 in elastic net regression model. (see separate excel file)**

**Table V. MetaSig-LE8 score correlation in SCCS (see separate excel file)**

**Table VI. Excluded metabolite (see separate excel file)**

## Supplemental Figures

**Fig. I. Overview of the current study design.** This study involved two nested case-control studies within the Southern Community Cohort Study (SCCS, primary cohort) and Shanghai Women's and Men's Health Studies (SWMHS, validation cohort). In the follow-up visits, participants with incident coronary heart disease (CHD) were identified and matched with controls by age, sex, race, fasting time, and time between sample collection and lab processing. After excluding eight samples that did not pass metabolomics quality control, 1194 SCCS participants and 598 SWMHS participants were included. Metabolite signature (MetSig) of Life's Essential 8 (LE8) was identified using elastic net regression with leave-one-out cross-validation in SCCS. The associations of LE8 score and its metabolite signature with risk of CHD were evaluated by conditional logistic regression adjusted for confounders. Mediation analysis was performed to assess the potential mediating role of metabolite signature on the LE8-CHD association. External validity of the metabolite signature related to LE8 score and CHD risk was investigated in SWMHS.

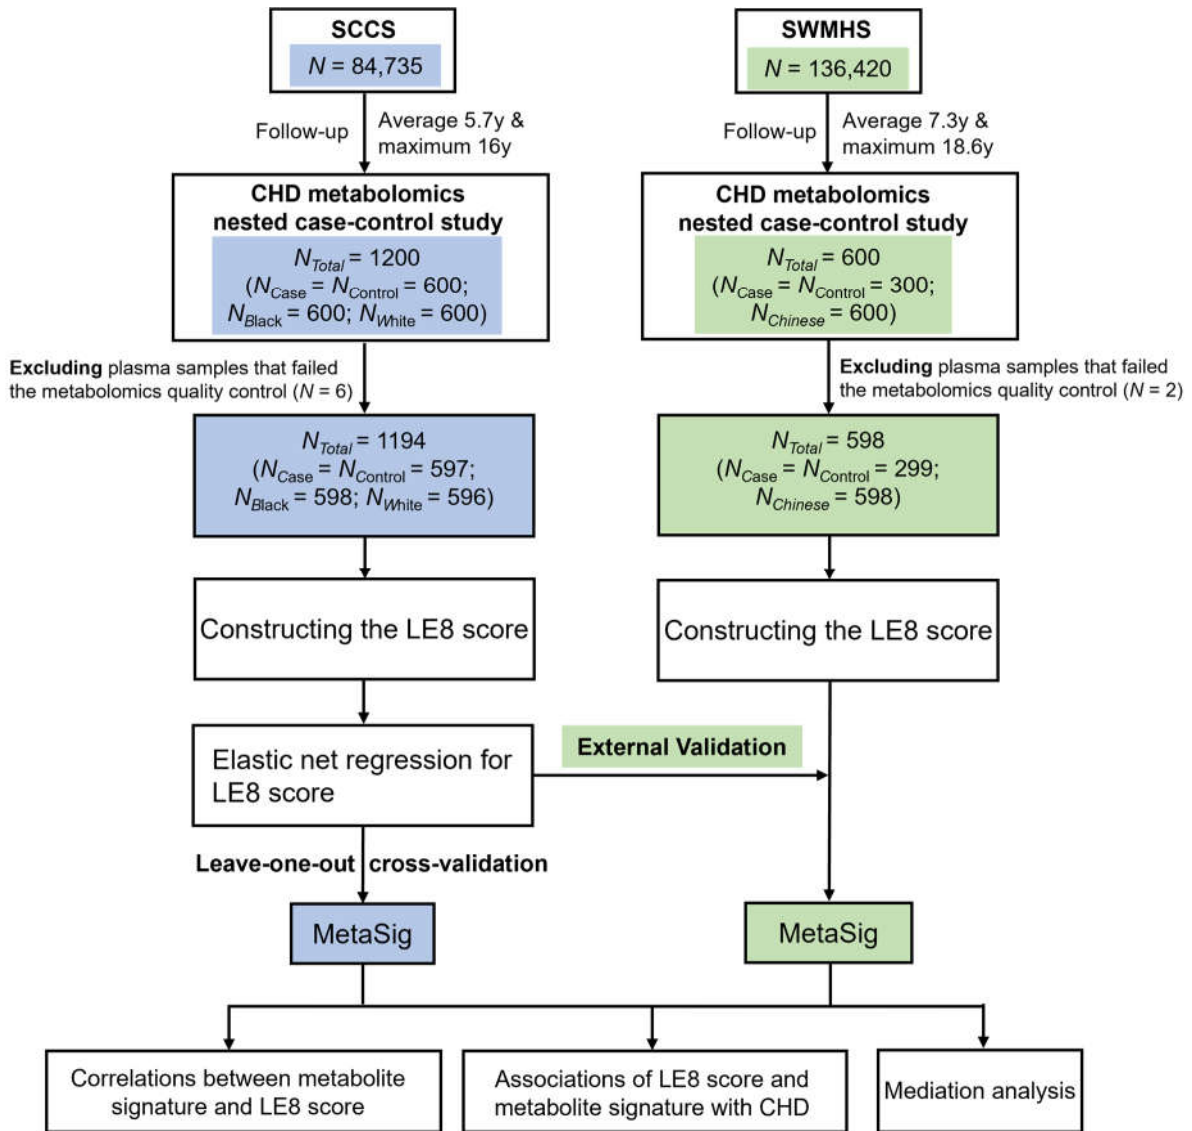

**Fig. II. Correlations between Life's Essential 8 score and its individual component scores in the SCCS (A) and SWMHS (B).** Values in the figures are *Spearman* correlation coefficients. Colors represent the extent of correlations. LE8, life's Essential 8; BMI, body mass index. SCCS, Southern Community Cohort Study; SWMHS, Shanghai Women's and Men's Health Studies.

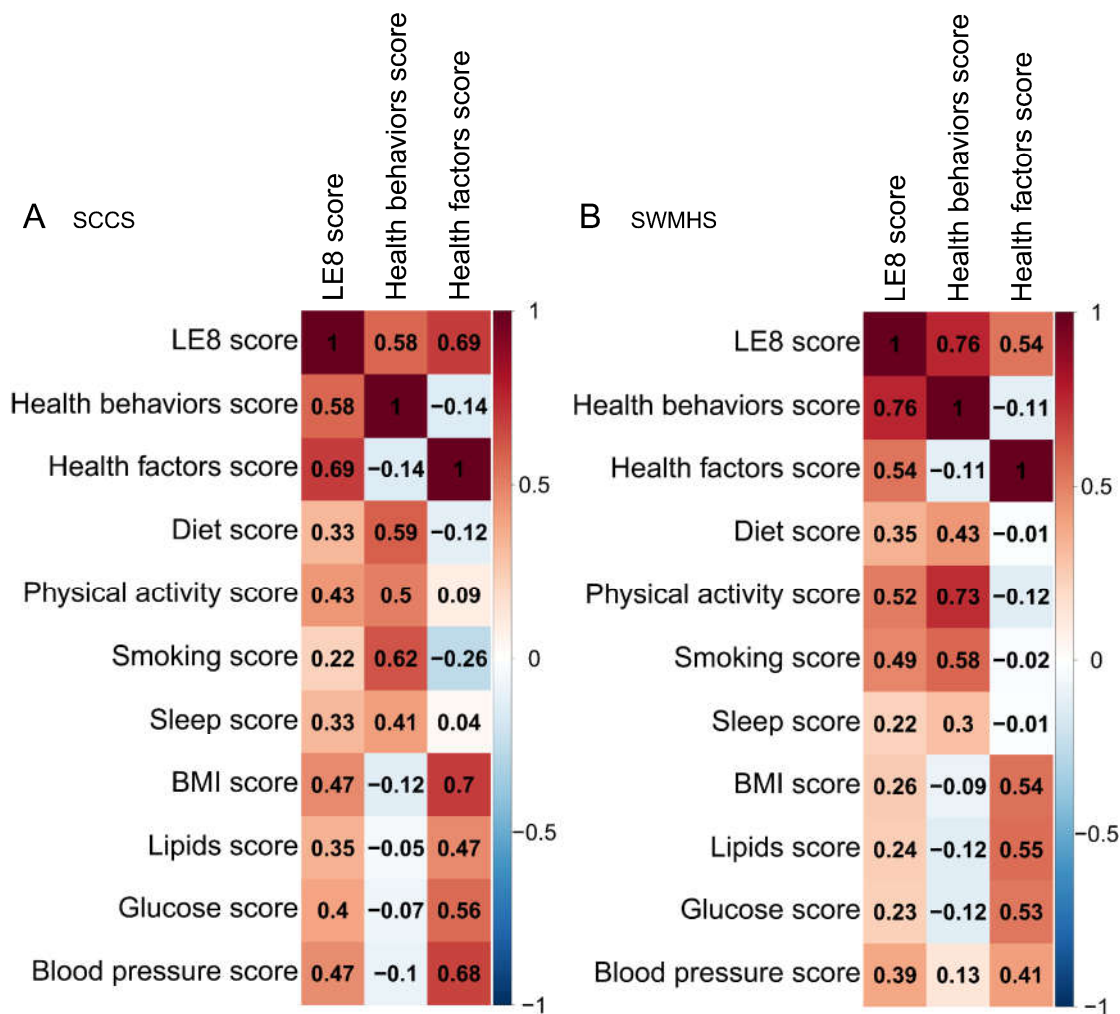



**Fig. III. The metabolite signature of health behaviors and its association with risk of CHD.** (A) Top 30 metabolites selected by elastic net regression in SCCS. Metabolites were ranked by the absolute value of regression coefficients. (B) *Spearman* correlation between MetaSig and health behaviors score in SCCS. (C) *Spearman* correlation between MetaSig and health behaviors score in SWMHS. (D) The mediation effect of MetaSig on the association between health behaviors score and risk of CHD in SCCS. (E) The mediation effect of MetaSig on the association between health behaviors score and risk of CHD in SWMHS. SCCS, Southern Community Cohort Study; SWMHS, Shanghai Women's and Men's Health Studies; MetaSig, metabolite signature; ACME, average causal mediation effects; ADE, average direct effects; CHD, coronary heart disease.

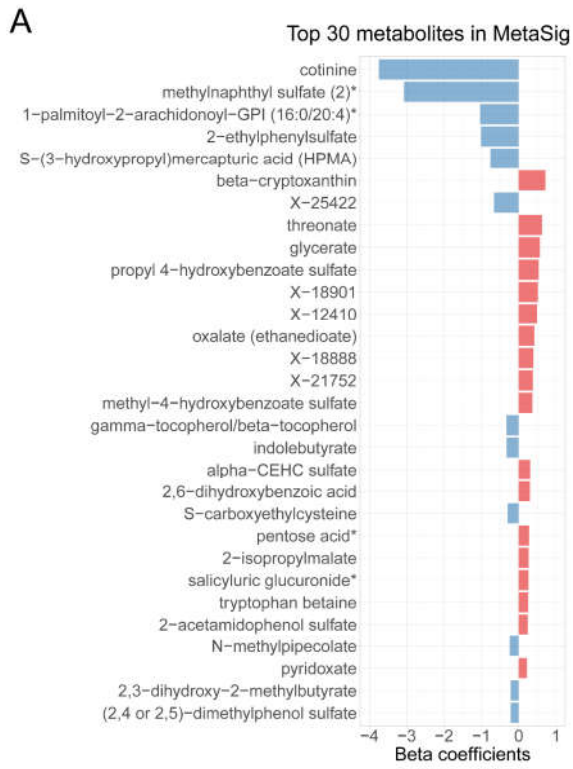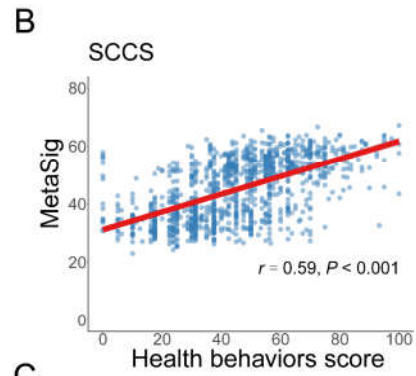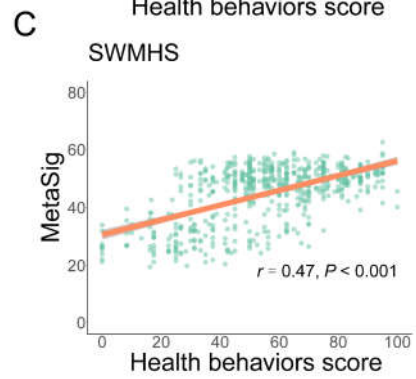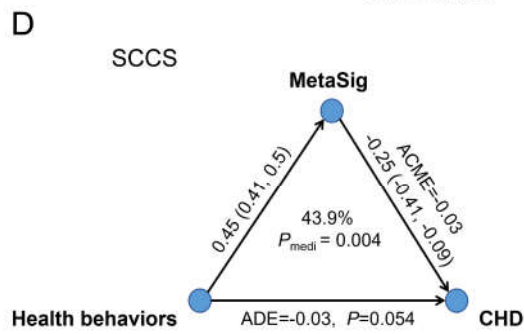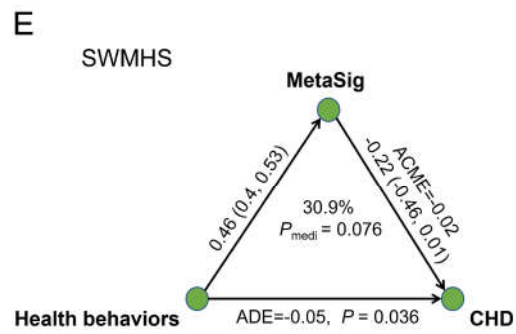

**Fig. IV. The metabolite signature of health factors and its association with risk of CHD.**

(A) Top 30 metabolites selected by elastic net regression in SCCS. Metabolites were ranked by the absolute value of regression coefficients. (B) *Spearman* correlation between MetaSig and health factors score in SCCS. (C) *Spearman* correlation between MetaSig and health factors score in SWMHS. (D) The mediation effect of MetaSig on the association between health factors score and risk of CHD in SCCS. (E) The mediation effect of MetaSig on the association between health factors score and risk of CHD in SWMHS. SCCS, Southern Community Cohort Study; SWMHS, Shanghai Women's and Men's Health Studies; MetaSig, metabolite signature; ACME, average causal mediation effects; ADE, average direct effects; CHD, coronary heart disease.

A

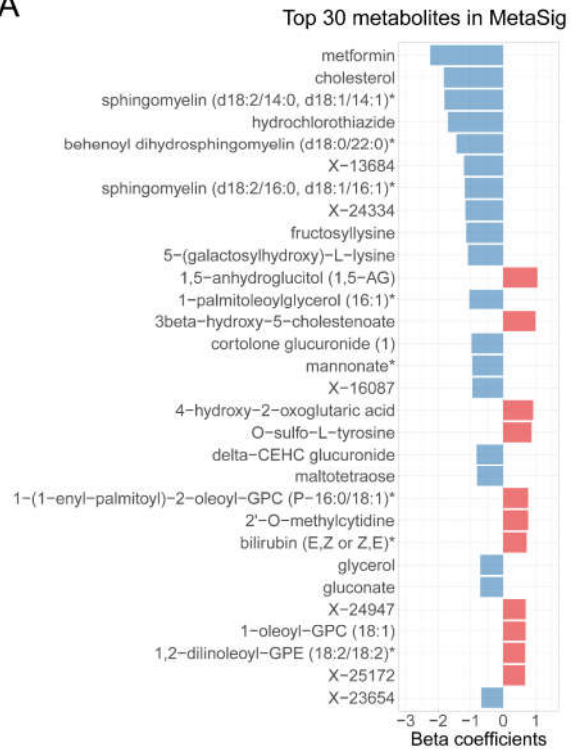

B

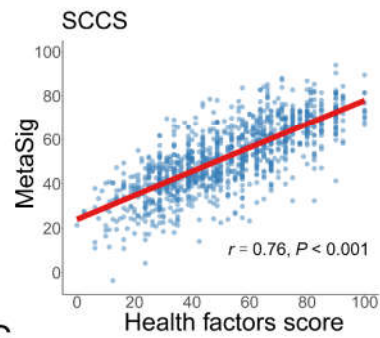

C

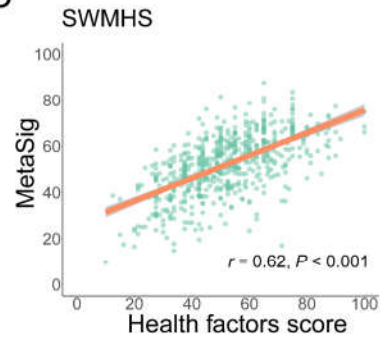

D

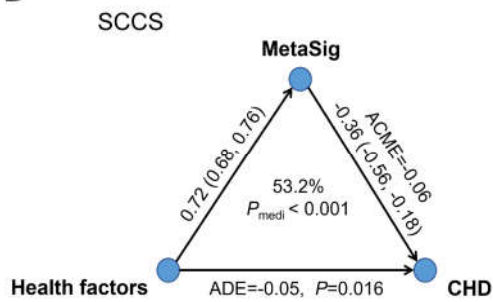

E

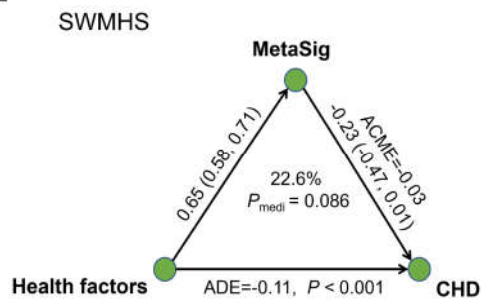

Supplement: NIHMS1945877-supplement-004230_-_Supplemental_Material.pdf [file NIHMS1945877-supplement-004230_-_Supplemental_Material.pdf]
